# Supplementary material for: Hydrophilic ionic liquid-assisted control of the size and morphology of ZnO nanoparticles prepared by a chemical precipitation method
Source: Royal Society of Chemistry journal article supplement (doi:10.1039/c6ra14955c), 2016-01-01
Supplement: c6ra14955c1.pdf [file c6ra14955c1.pdf]

*RSC Advances*

**Hydrophilic ionic liquid-assisted control of size and morphology of ZnO nanoparticles prepared by chemical precipitation method<sup>†</sup>**

Mousumi Akter,<sup>a</sup> Shazia Sharmin Satter,<sup>a</sup> Ajaya Kumar Singh,<sup>b</sup> M. Muhibur Rahman,<sup>c</sup> M. Yousuf A. Mollah<sup>c</sup>, and Md. Abu Bin Hasan Susan<sup>a\*</sup>

<sup>a</sup>*Department of Chemistry, University of Dhaka, Dhaka 1000, Bangladesh*

<sup>b</sup>*Department of Chemistry, Govt. V. Y. T. PG. Autonomous College, Chhattisgarh, India*

<sup>c</sup>*University Grants Commission of Bangladesh, 29/1 Agargaon, Sher-E-Banla Naar, Dhaka 1207, Bangladesh*

**<sup>†</sup>Electronic supplementary information (ESI)**

**Fig. S1** EDX spectrum of ZnO NPs.

**Fig. S2** Structure of [EMIM][MeSO<sub>4</sub>]

**Fig. S3** Zeta potential distribution curve of ZnO NPs in the absence of ionic liquid.

**Fig. S4** Zeta potential distribution curve of ZnO NPs in 5.0% IL(v/v).

**Fig. S5** Size distribution curve for [EMIM][MeSO<sub>4</sub>].

**Fig. S6** SEM images (filament technique) of ZnO NPs synthesized in absence of [EMIM][MeSO<sub>4</sub>] (a) and in presence of (b) 0.1% (c) 1.5% (d) 2% (e) 3.5% (f) 5% (v/v) [EMIM][MeSO<sub>4</sub>]

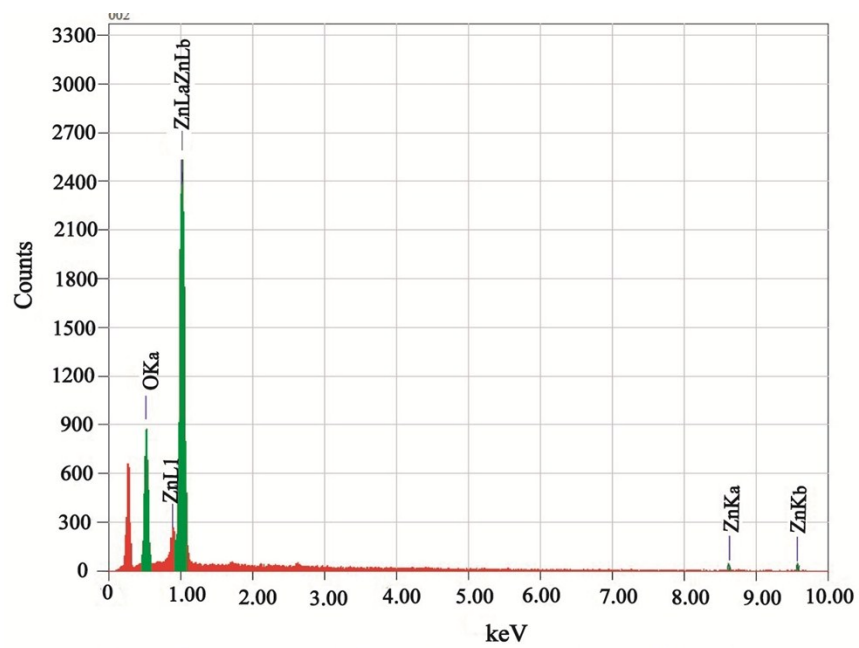

Fig. S1 EDX spectrum of ZnO NPs.

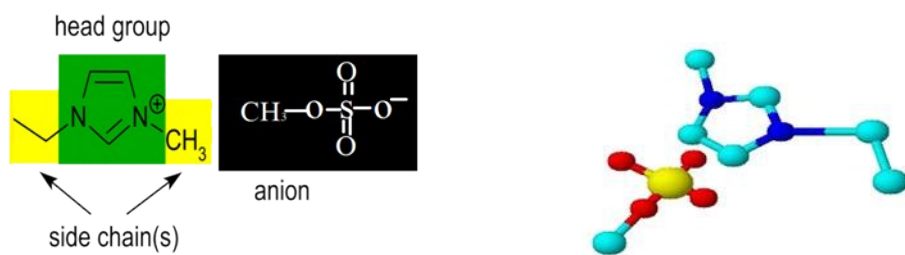

Fig. S2 Structure of [EMIM][ MeSO<sub>4</sub>].

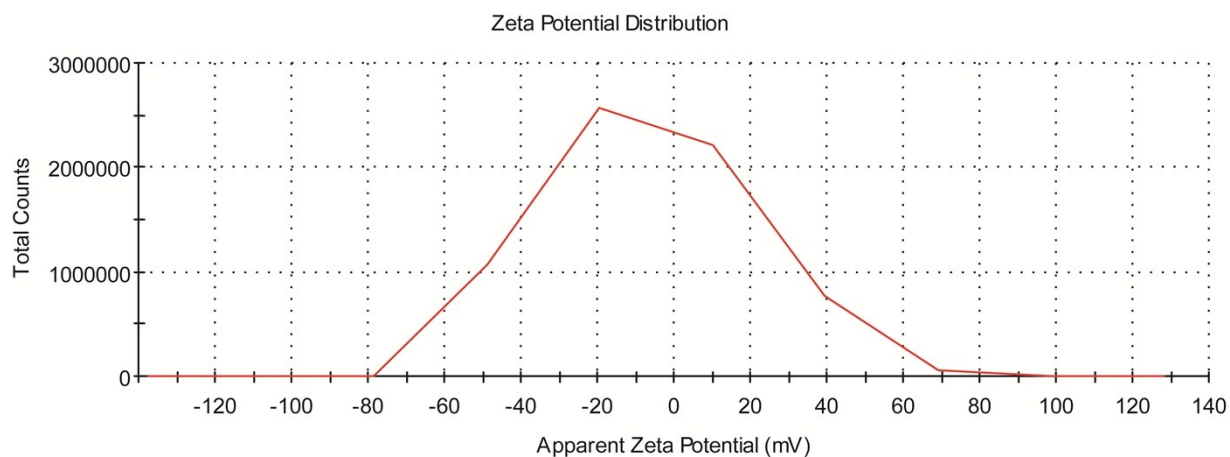

**Fig. S3** Zeta potential distribution curve of ZnO NPs in absence of ionic liquid.

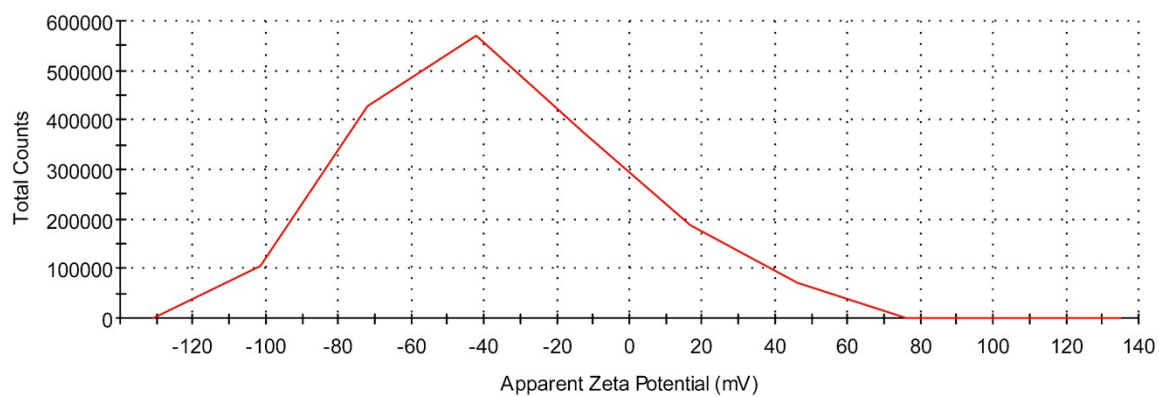

**Fig. S4** Zeta potential distribution curve of ZnO NPs in 5% IL(v/v).

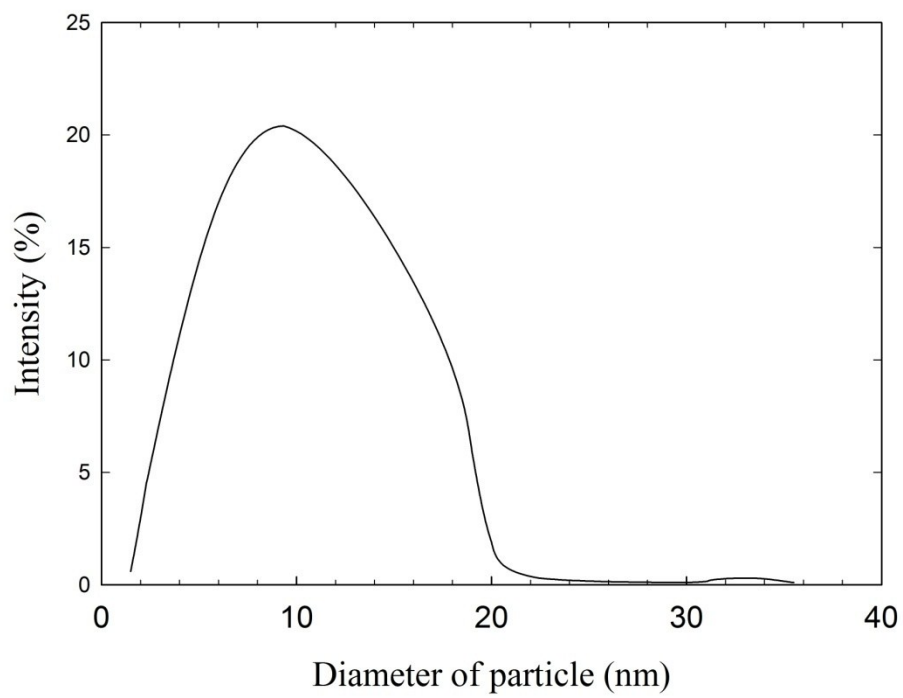

**Fig. S5** Size distribution curve for [EMIM][MeSO<sub>4</sub>].

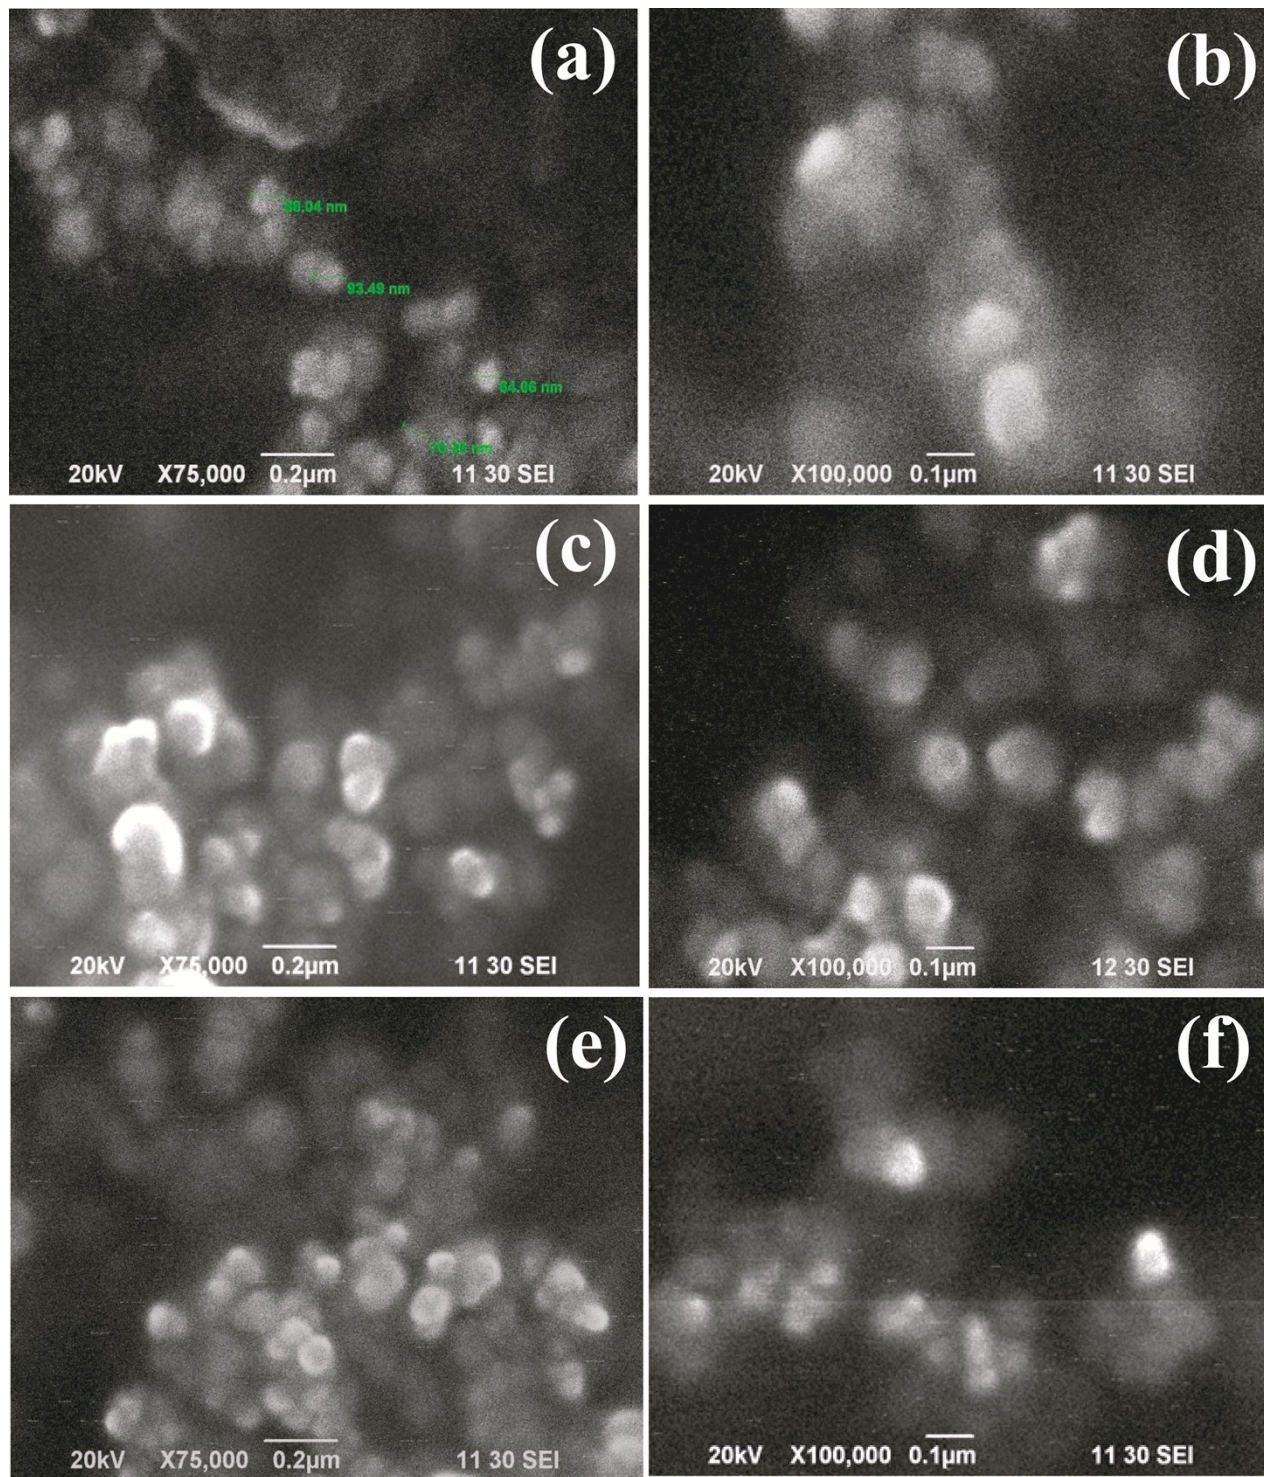

**Fig. S6** SEM images of ZnO NPs synthesized in absence of [EMIM][MeSO<sub>4</sub>] (a) and in presence of (b) 0.1% (c) 1.5% (d) 2% (e) 3.5% (f) 5% (v/v) [EMIM][MeSO<sub>4</sub>].
